# Supplementary material for: Active site tuning based on pseudo-binary alloys for low-temperature acetylene semihydrogenation
Source: Royal Society of Chemistry journal article supplement (doi:10.1039/d3sc03704e), 2024-01-01
Supplement: d3sc03704e1.pdf [file d3sc03704e1.pdf]

## Supporting Information

# Active Site Tuning Based on Pseudo-Binary Alloys for Low-Temperature Acetylene Semihydrogenation

Jiamin Ma,<sup>a,†</sup> Feilong Xing,<sup>a</sup> Ken-ichi Shimizu,<sup>a</sup> and Shinya Furukawa<sup>a,†,\*</sup>

*a Institute for Catalysis, Hokkaido University, N-21, W-10, Sapporo 001-0021, Japan*

*† present address: Division of Applied Chemistry, Graduate School of Engineering,  
Osaka University, Osaka 565-0871, Japan*

*E-mail: furukawa@chem.eng.osaka-u.ac.jp,*

*Tel: +81-6-6879-7808*

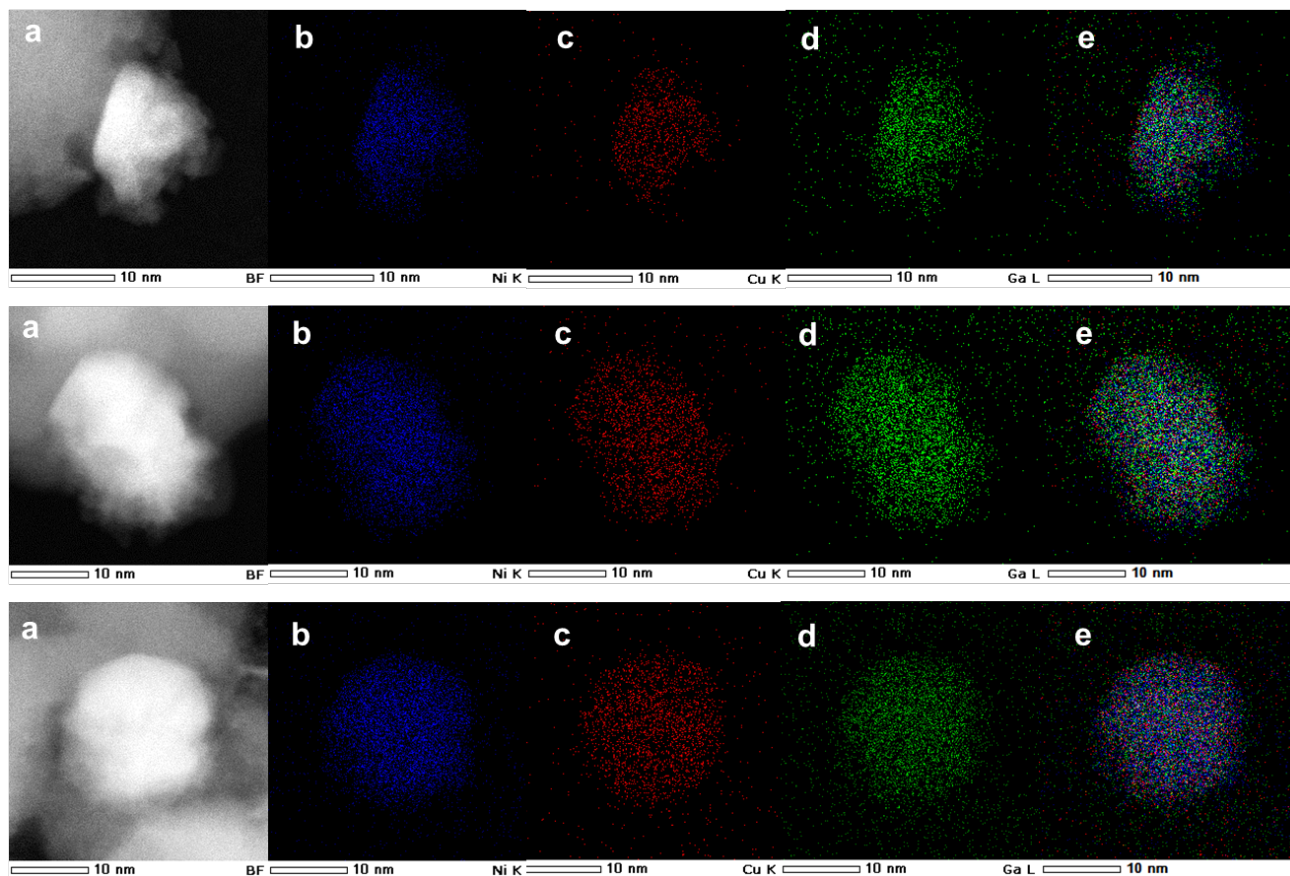

Figure S1. (a) HAADF–STEM image and the corresponding elemental maps for (b) Ni, (c) Cu, (d) Ga, (e) Ni+Cu+Ga (magnified for a few particles) for  $(\text{Ni}_{0.8}\text{Cu}_{0.2})_3\text{Ga}/\text{TiO}_2$ .

Table S1. Particle size of  $(\text{Ni}_{0.8}\text{Cu}_{0.2})_3\text{Ga}/\text{TiO}_2$ ,  $(\text{Ni}_{0.8}\text{Cu}_{0.2})_3\text{Ga}/\text{SiO}_2$  and  $\text{Ni}_3\text{Ga}/\text{TiO}_2$  calculated according to Scherrer equation.

| catalysts                                                  | Scherrer constant | half with / degree | center / degree | crystallite size / nm |
|------------------------------------------------------------|-------------------|--------------------|-----------------|-----------------------|
| $(\text{Ni}_{0.8}\text{Cu}_{0.2})_3\text{Ga}/\text{TiO}_2$ |                   | 0.76               | 43.52           | 10.6                  |
| $\text{Ni}_3\text{Ga}/\text{TiO}_2$                        | 0.849             | 1.03               | 43.74           | 7.8                   |
| $(\text{Ni}_{0.8}\text{Cu}_{0.2})_3\text{Ga}/\text{SiO}_2$ |                   | 1.60               | 43.74           | 5.1                   |

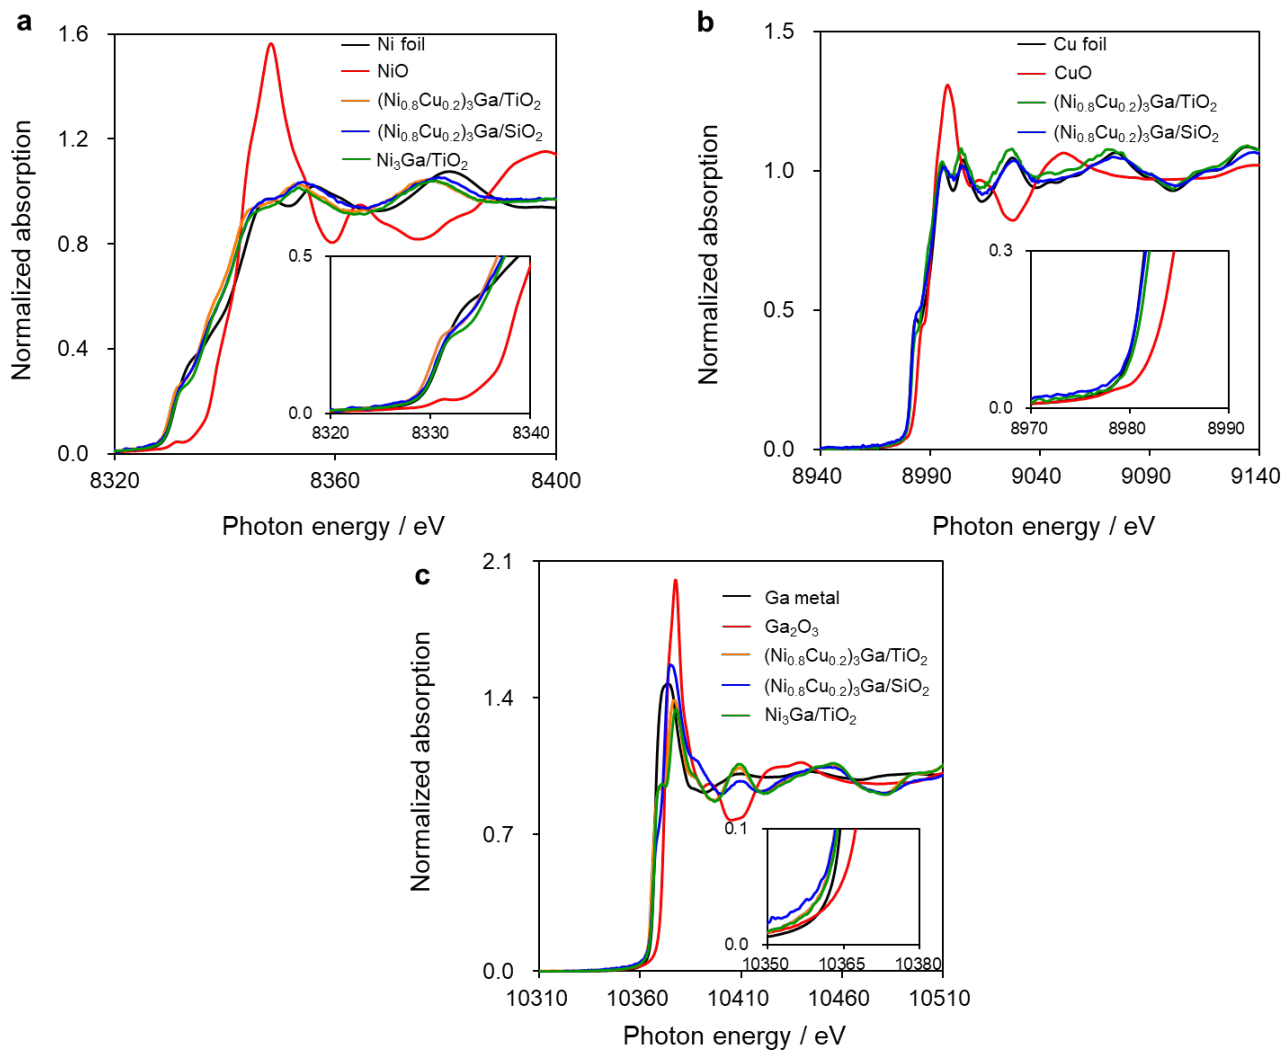

Figure S2. (a) Ni, (b) Cu, and (c) Ga K-edge XANES spectra of over  $(\text{Ni}_{0.8}\text{Cu}_{0.2})_3\text{Ga}/\text{TiO}_2$ ,  $(\text{Ni}_{0.8}\text{Cu}_{0.2})_3\text{Ga}/\text{SiO}_2$ ,  $\text{Ni}_3\text{Ga}/\text{TiO}_2$  and reference compounds.

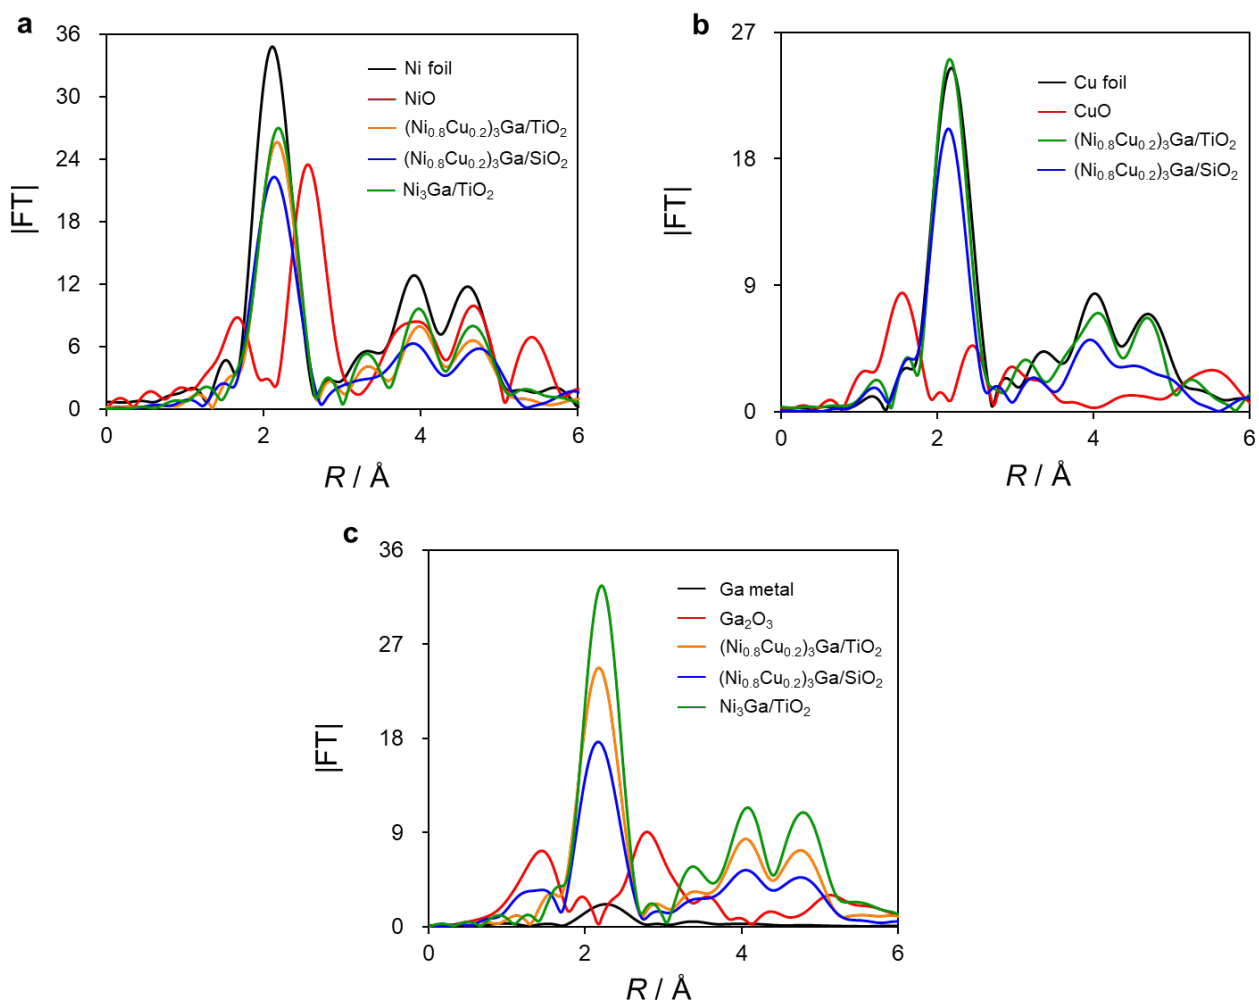

Figure S3. Fourier-transforms of EXAFS in (a) Ni, (b) Cu, and (c) Ga K-edge over  $(\text{Ni}_{0.8}\text{Cu}_{0.2})_3\text{Ga}/\text{TiO}_2$ ,  $(\text{Ni}_{0.8}\text{Cu}_{0.2})_3\text{Ga}/\text{SiO}_2$ ,  $\text{Ni}_3\text{Ga}/\text{TiO}_2$ . and reference compounds.

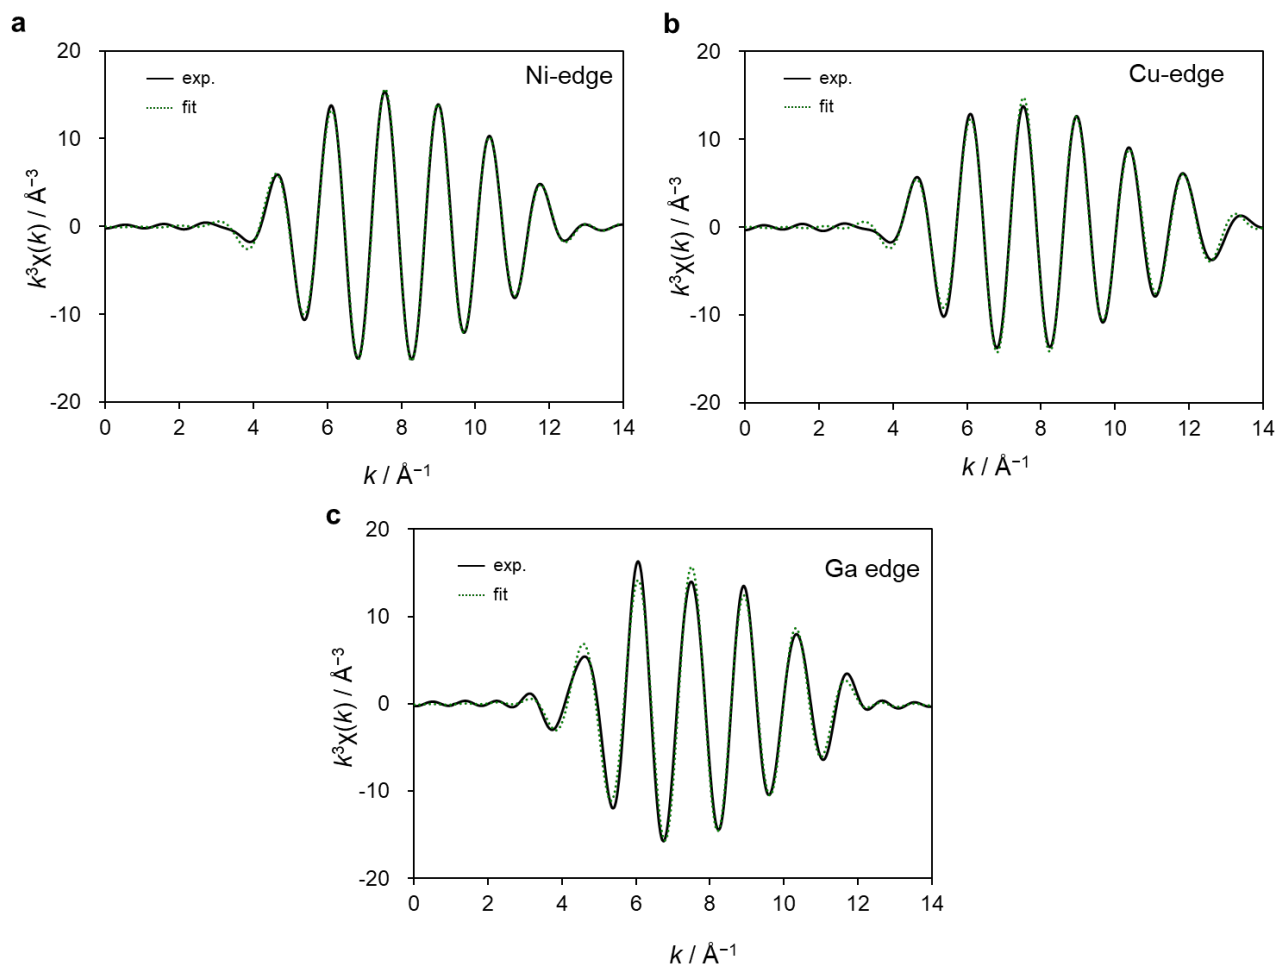

Figure S4. Curve-fitting results of (a) Ni (b) Cu and (c) Ga K-edge  $k^3$ -weighted EXAFS of  $(\text{Ni}_{0.8}\text{Cu}_{0.2})_3\text{Ga}/\text{TiO}_2$ . Solid and dashed lines indicate the results of simulation and experiment, respectively.

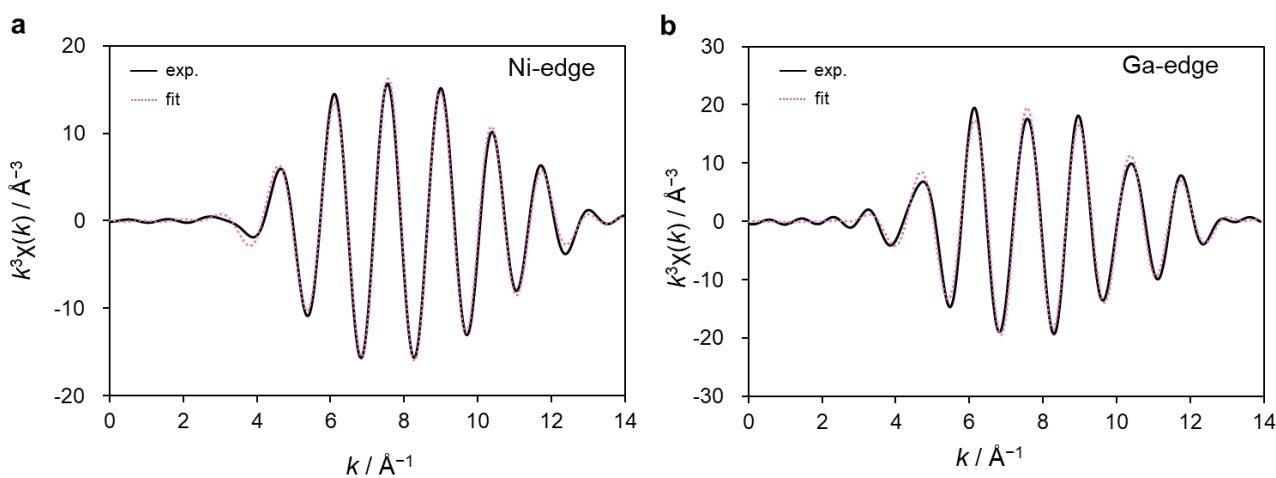

Figure S5. Curve-fitting results of (a) Ni and (b) Ga K-edge  $k^3$ -weighted EXAFS of  $\text{Ni}_3\text{Ga}/\text{TiO}_2$ . Solid and dashed lines indicate the results of simulation and experiment, respectively.

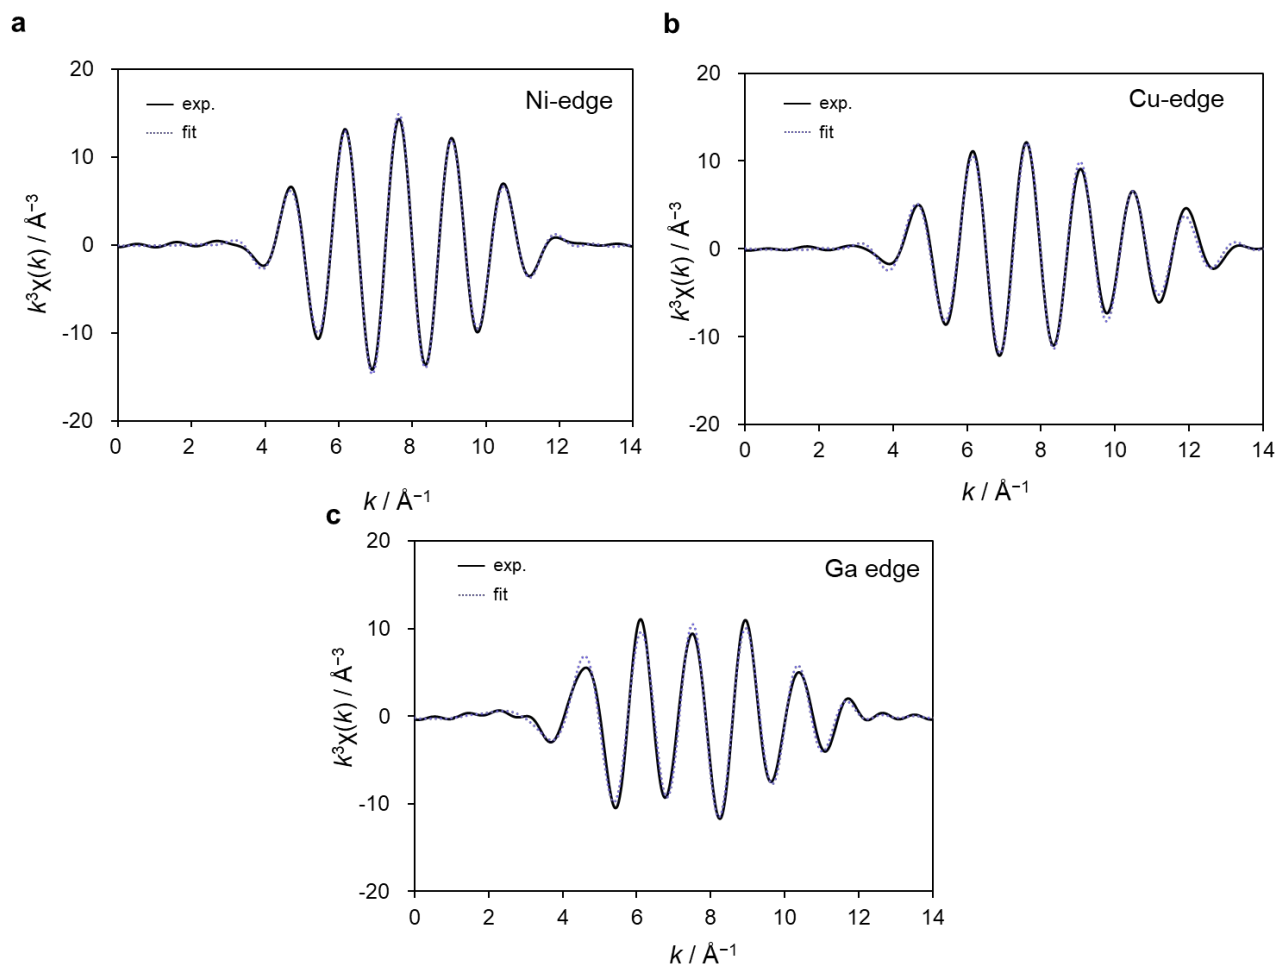

Figure S6. Curve-fitting results of (a) Ni (b) Cu and (c) Ga K-edge  $k^3$ -weighted EXAFS of  $(\text{Ni}_{0.8}\text{Cu}_{0.2})_3\text{Ga}/\text{SiO}_2$ . Solid and dashed lines indicate the results of simulation and experiment, respectively.

Table S2. Summary of the EXAFS curve fitting for  $(\text{Ni}_{0.8}\text{Cu}_{0.2})_3\text{Ga}/\text{TiO}_2$ ,  $(\text{Ni}_{0.8}\text{Cu}_{0.2})_3\text{Ga}/\text{SiO}_2$ ,  $\text{Ni}_3\text{Ga}/\text{TiO}_2$  catalysts and reference.

| Sample                                                     | Edge | Shell     | $S_0^2$ | CN        | $r$ (Å)   | $\Delta E_0$ (eV) | $\sigma^2$ (Å <sup>2</sup> ) | R-factor |
|------------------------------------------------------------|------|-----------|---------|-----------|-----------|-------------------|------------------------------|----------|
| Ni foil                                                    | Ni k | Ni-Ni     | 0.846   | 12        | 2.48±0.01 | 5.43±0.7          | 0.00621                      | 0.003    |
| Cu foil                                                    | Cu k | Cu-Cu     | 0.918   | 12        | 2.54±0.02 | 6.26±0.9          | 0.0088                       | 0.005    |
|                                                            |      | Ga-O      |         | 3         | 1.91±0.09 |                   | 0.00657                      |          |
| $\text{Ga}_2\text{O}_3$                                    | Ga k | Ga-O      | 1.316   | 1         | 2.12±0.25 | 6.84±1.8          | 0.00361                      | 0.014    |
|                                                            |      | Ga-Ga     |         | 2         | 3.05±0.01 |                   | 0.00338                      |          |
| $(\text{Ni}_{0.8}\text{Cu}_{0.2})_3\text{Ga}/\text{TiO}_2$ | Ni k | Ni-Ga     |         | 3.50±0.99 | 2.46±0.07 |                   | 0.00415                      | 0.003    |
|                                                            |      | Ni-Ni(Cu) | 0.846   | 7.00±0.99 | 2.58±0.08 | 5.40±1.5          | 0.00472                      |          |
|                                                            | Cu k | Cu-Ga     |         | 2.79±0.48 | 2.49±0.04 |                   | 0.00275                      | 0.008    |
|                                                            |      | Cu-Cu(Ni) | 0.918   | 8.38±0.48 | 2.60±0.04 | 2.81±1.8          | 0.00799                      |          |
|                                                            | Ga k | Ga-O      |         | 2.11±0.29 | 2.03±0.20 |                   | 0.0698                       | 0.005    |
|                                                            |      | Ga-Ni(Cu) | 1.316   | 8.46±0.28 | 2.54±0.00 | 0.65±1.7          | 0.00914                      |          |
| $(\text{Ni}_{0.8}\text{Cu}_{0.2})_3\text{Ga}/\text{SiO}_2$ | Ni k | Ni-Ga     |         | 3.29±0.64 | 2.43±0.11 |                   | 0.00185                      | 0.018    |
|                                                            |      | Ni-Ni(Cu) | 0.846   | 6.58±0.64 | 2.57±0.04 | 4.51±1.1          | 0.00323                      |          |
|                                                            | Cu k | Cu-Ga     |         | 3.59±0.93 | 2.29±0.24 |                   | 0.02631                      | 0.01     |
|                                                            |      | Cu-Cu(Ni) | 0.918   | 10.8±0.93 | 2.50±0.05 | 9.38±2.3          | 0.00953                      |          |
|                                                            | Ga k | Ga-O      |         | 1.47±0.20 | 1.81±0.01 |                   | 0.00796                      | 0.02     |
|                                                            |      | Ga-Ni(Cu) | 1.316   | 5.89±0.20 | 2.54±0.00 | 1.91±1.6          | 0.00897                      |          |
| $\text{Ni}_3\text{Ga}/\text{TiO}_2$                        | Ni k | Ni-Ga     |         | 3.51±1.22 | 2.45±0.09 |                   | 0.00421                      | 0.006    |
|                                                            |      | Ni-Ni     | 0.846   | 7.03±1.23 | 2.57±0.04 | 6.27±1.9          | 0.00389                      |          |
|                                                            | Ga k | Ga-O      |         | 2.28±1.10 | 1.79±0.04 |                   | 0.13945                      | 0.021    |
|                                                            |      | Ga-Ni     | 1.316   | 9.11±1.12 | 2.53±0.00 | 5.20±1.5          | 0.00811                      |          |

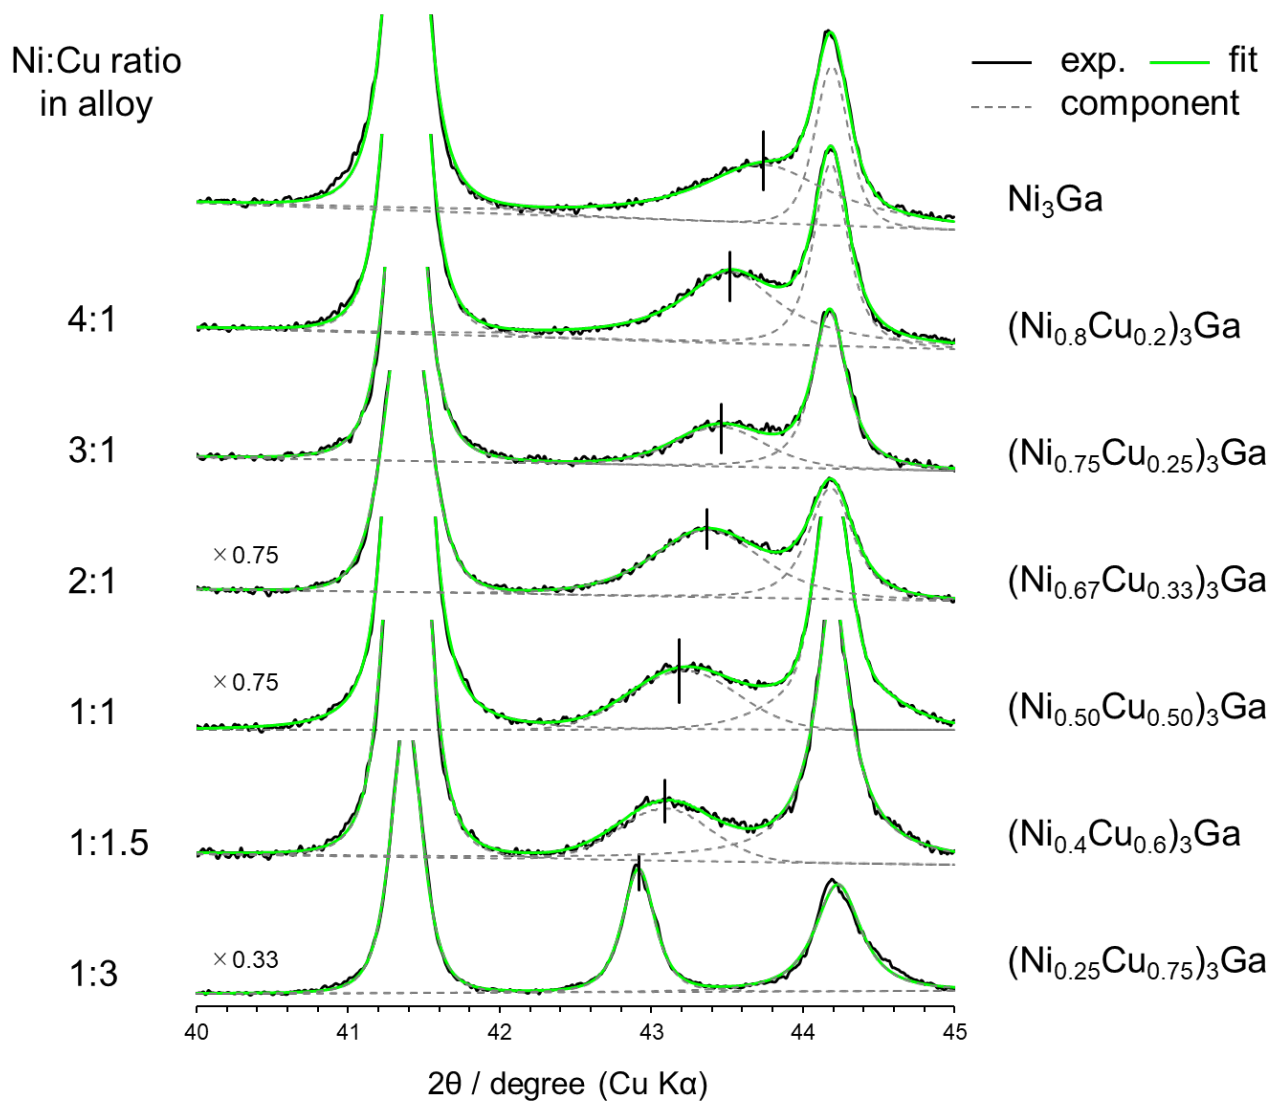

Figure S7. XRD analysis for  $(\text{Ni}_{1-x}\text{Cu}_x)_3\text{Ga}/\text{TiO}_2$  ( $x = 0, 0.2, 0.25, 0.33, 0.5, 0.6, 0.75$ ) catalysts. Vertical solid lines indicate the diffraction angles of the corresponding  $(\text{Ni}_{1-x}\text{Cu}_x)_3\text{Ga}$  phases.



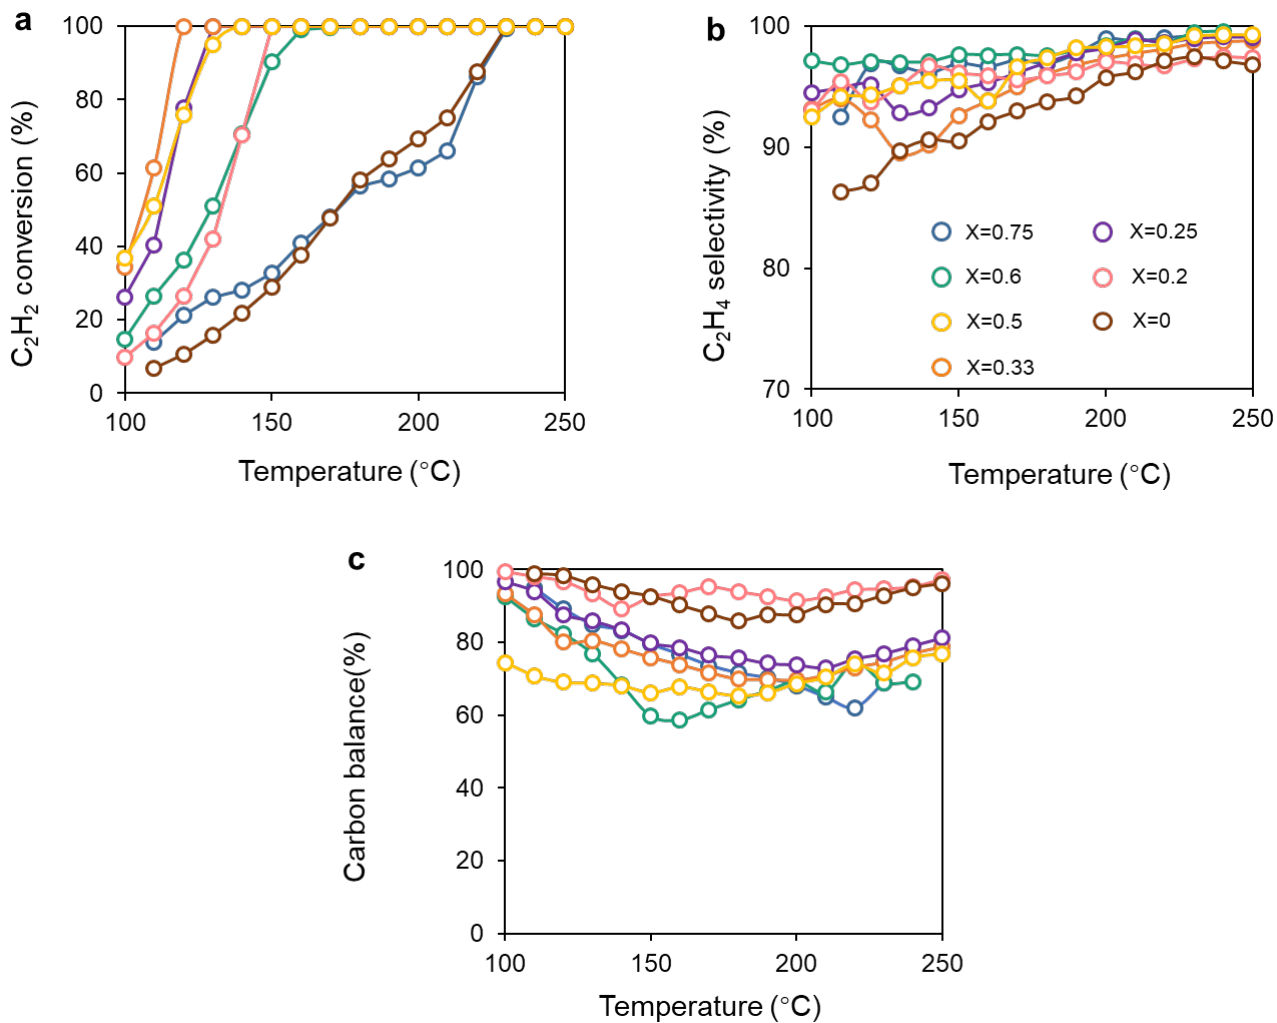

Figure S8. (a)  $C_2H_2$  conversion, (b)  $C_2H_4$  selectivity and (c) carbon balance as a function of reaction temperature over  $(Ni_{1-x}Cu_x)_3Ga/TiO_2$ .

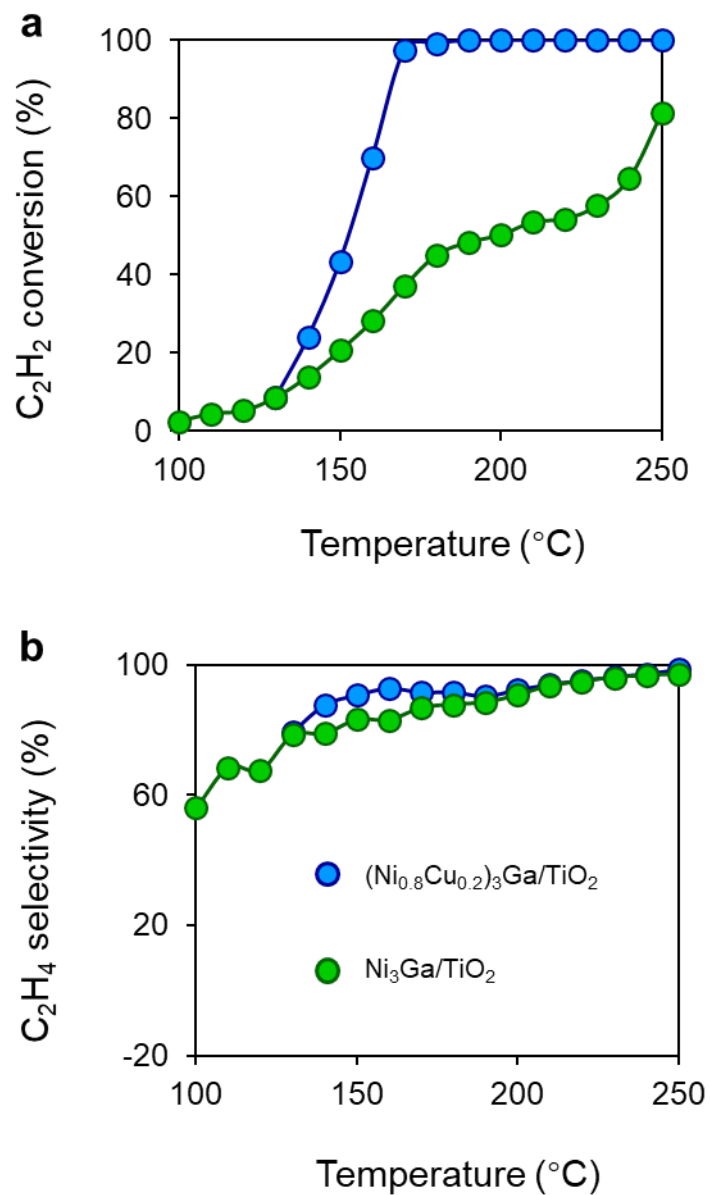

Figure S9. (a)  $\text{C}_2\text{H}_2$  conversion and (b)  $\text{C}_2\text{H}_4$  selectivity as a function of reaction temperature in the presence of ethylene ( $\text{C}_2\text{H}_2:\text{H}_2:\text{He}:\text{C}_2\text{H}_4 = 1:10:39:5 \text{ mLmin}^{-1}$ ) over  $(\text{Ni}_{0.8}\text{Cu}_{0.2})_3\text{Ga}/\text{TiO}_2$  and  $\text{Ni}_3\text{Ga}/\text{TiO}_2$ .

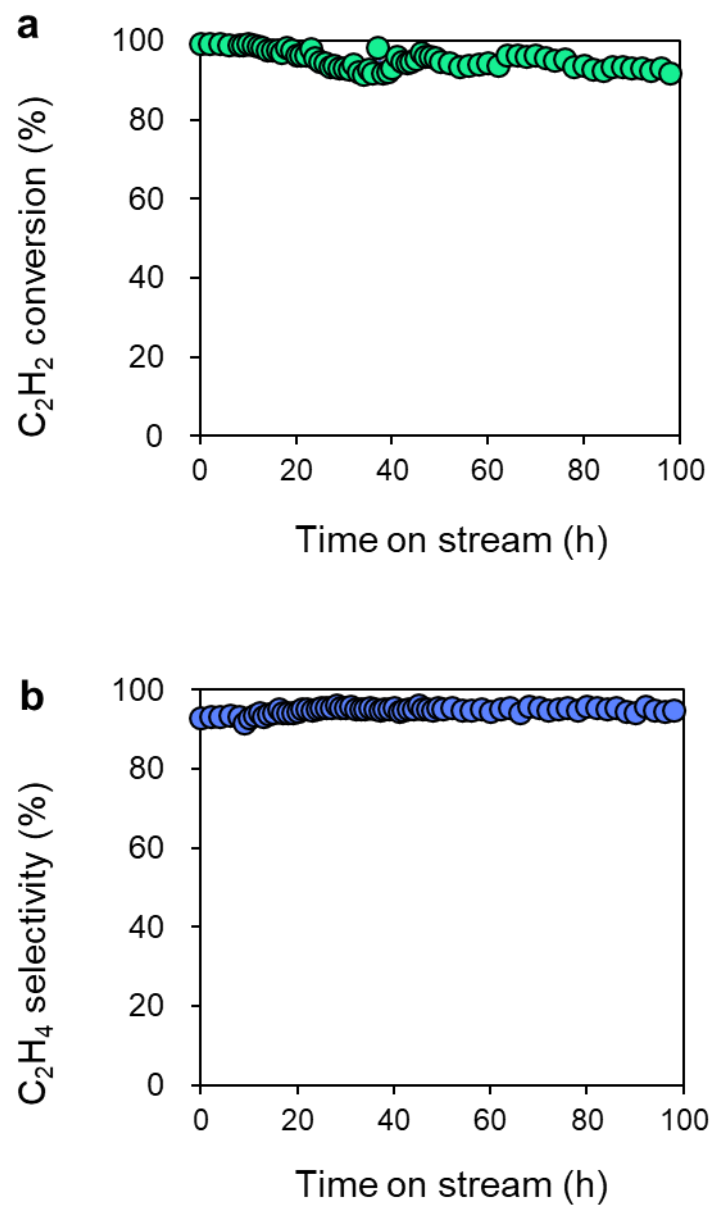

Figure S10. Long-term stability test using  $(\text{Ni}_{0.8}\text{Cu}_{0.2})_3\text{Ga}/\text{TiO}_2$  in the presence of excess ethylene ( $\text{C}_2\text{H}_2:\text{H}_2:\text{He}:\text{C}_2\text{H}_4 = 1:10:39:5 \text{ mLmin}^{-1}$ ) at  $180^\circ\text{C}$ . (a)  $\text{C}_2\text{H}_2$  conversion and (b)  $\text{C}_2\text{H}_4$  selectivity.

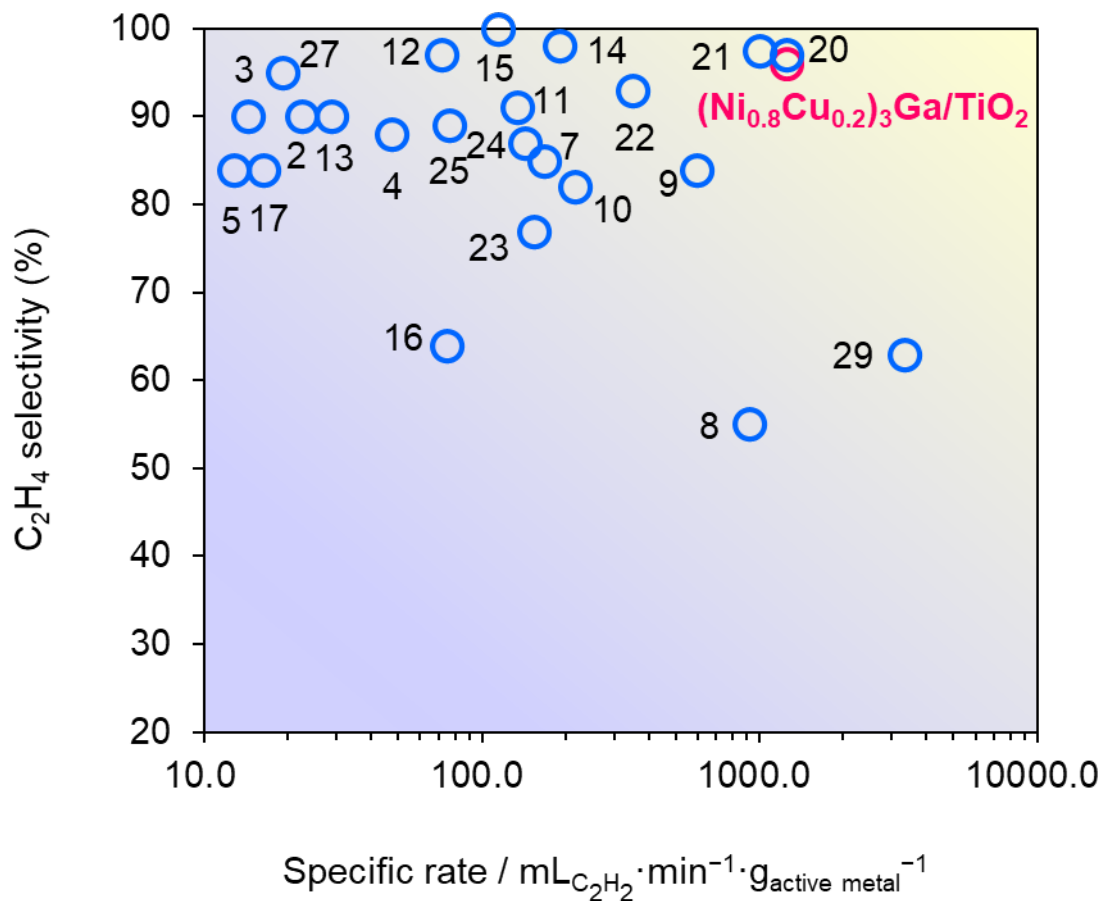

Figure S11. Relationship between the specific activity and ethylene selectivity at high acetylene conversion (>80%) for 3d transition metal-based catalysts that were reported in literature and developed in this study. Numbers correspond to the entries in Table S3.

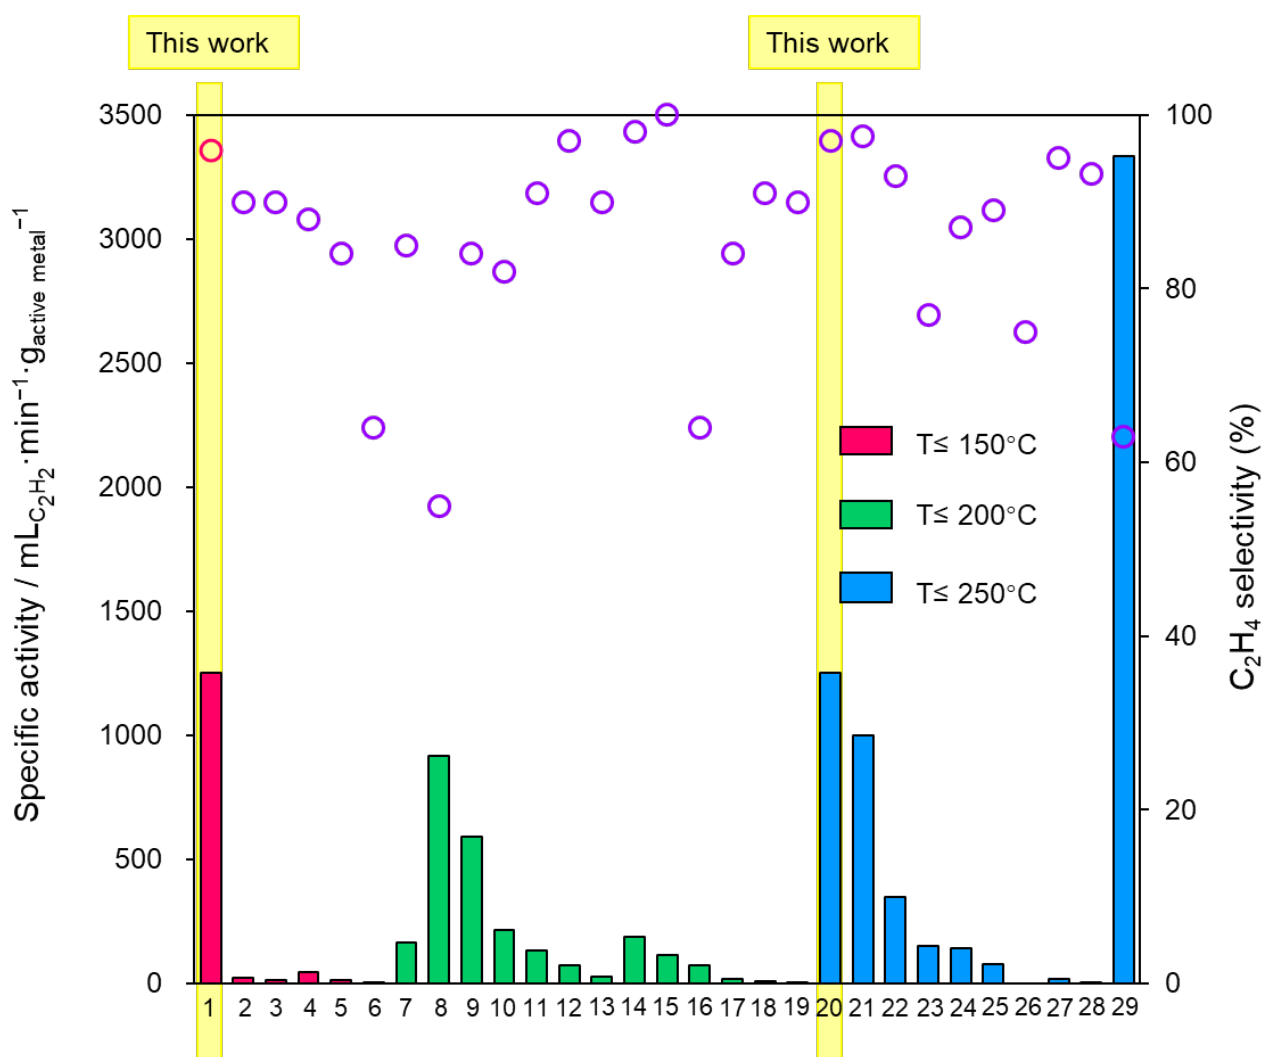

Figure S12. Relationship between the specific activity and ethylene selectivity at high acetylene conversion (>80%) at different reaction temperature for 3d transition metal-based catalysts that were reported in literature and developed in this study. Numbers correspond to the entries in Table S3.

Table S3. Summary of reaction conditions and catalytic performances in acetylene semihydrogenation using 3d transition metal-based catalysts that were reported in literature and developed in this study.

| entry | catalyst                                                                | loading amount (wt%) | amount / mg | C <sub>2</sub> H <sub>2</sub> flow / mLmin <sup>-1</sup> | C <sub>2</sub> H <sub>2</sub> : H <sub>2</sub> : C <sub>2</sub> H <sub>4</sub> | total flow / mLmin <sup>-1</sup> | GHSV / mLg <sup>-1</sup> h <sup>-1</sup> | conv. (%) | sel. (%) | temp. / °C | specific rate / mL <sub>C<sub>2</sub>H<sub>2</sub></sub> min <sup>-1</sup> g <sub>M</sub> <sup>-1</sup> | Operation time (h) | ref       |
|-------|-------------------------------------------------------------------------|----------------------|-------------|----------------------------------------------------------|--------------------------------------------------------------------------------|----------------------------------|------------------------------------------|-----------|----------|------------|---------------------------------------------------------------------------------------------------------|--------------------|-----------|
| 1     | (Ni <sub>0.8</sub> Cu <sub>0.2</sub> ) <sub>3</sub> Ga/TiO <sub>2</sub> | 1                    | 80          | 1                                                        | 1 : 10 : 0                                                                     | 50                               | 37500                                    | 100       | 96       | 150        | 1250.0                                                                                                  | 60                 | This work |
| 2     | Ni <sub>3</sub> GaCo <sub>5</sub> /MgAl LDH                             | 14.88                | 150         | 0.5                                                      | 0.5:2.5:10                                                                     | 100                              | 40000                                    | 100       | 90       | 110        | 22.4                                                                                                    | 36                 | 1         |
| 3     | Ni <sub>1</sub> MoS/Al <sub>2</sub> O <sub>3</sub>                      | 3.5                  | 500         | 0.2475                                                   | 1:20:0                                                                         | 165                              | 19800                                    | 100       | 90       | 125        | 14.1                                                                                                    | 16                 | 2         |
| 4     | NiCu/MgAl-MMO                                                           | 9.58                 | 100         | 0.558                                                    | 1 : 2 : 103                                                                    | 166                              | 100500                                   | 81        | 88       | 140        | 47.2                                                                                                    | 36                 | 3         |
| 5     | Cu(OH) <sub>2</sub>                                                     | 78.9                 | 100         | 1                                                        | 1 : 9 : 0                                                                      | 10                               | 6000                                     | 100       | 84       | 110        | 12.7                                                                                                    | 250                | 4         |
| 6     | Cu <sub>2</sub> O                                                       | 88.8                 | 100         | 0.045                                                    | 1 : 22 : 197                                                                   | 10                               | 6000                                     | 100       | 64       | 120        | 0.5                                                                                                     | 100                | 5         |
| 7     | Ni <sub>3</sub> ZnCo <sub>7</sub> /C                                    | 12                   | 50          | 1                                                        | 1:15:0                                                                         | 100                              | 120000                                   | 100       | 85       | 165        | 166.7                                                                                                   | 10                 | 6         |
| 8     | AgNi <sub>0.5</sub> /SiO <sub>2</sub>                                   | 1.09                 | 30          | 0.3                                                      | 1:20:0                                                                         | 30                               | 60000                                    | 100       | 55       | 180        | 917.4                                                                                                   | 24                 | 7         |
| 9     | Ni/g-C <sub>3</sub> N <sub>4</sub> -T                                   | 1                    | 50          | 0.3                                                      | 1:10:20                                                                        | 30                               | 36000                                    | 99        | 84       | 175        | 594.0                                                                                                   | 20                 | 8         |
| 10    | NiGa/MgAl-LDH                                                           | 10                   | 50          | 1.2                                                      | 1 : 10 : 20                                                                    | 120                              | 144000                                   | 90        | 82       | 190        | 216.0                                                                                                   | 24                 | 9         |
| 11    | 0.5Cu/Al <sub>2</sub> O <sub>3</sub>                                    | 0.5                  | 300         | 0.2                                                      | 1 : 10 : 50                                                                    | 20                               | 4000                                     | 100       | 91       | 188        | 133.3                                                                                                   | 40                 | 10        |
| 12    | Na-Ni/CHA                                                               | 3.5                  | 200         | 0.5                                                      | 1 : 16 : 0                                                                     | 50                               | 15000                                    | 100       | 97       | 170        | 71.4                                                                                                    | 20                 | 11        |
| 13    | Ni <sub>1</sub> Cu <sub>2</sub> /g-C <sub>3</sub> N <sub>4</sub>        | 3.5                  | 150         | 0.15                                                     | 1 : 10 : 50                                                                    | 30                               | 12000                                    | 100       | 90       | 160        | 28.6                                                                                                    | 400                | 12        |
| 14    | Cu <sub>1</sub> /ND                                                     | 0.25                 | 200         | 0.1                                                      | 1 : 10 : 20                                                                    | 10                               | 3000                                     | 95        | 98       | 200        | 190.0                                                                                                   | 60                 | 13        |
| 15    | Ni-CeO <sub>2</sub>                                                     | 1.54                 | 200         | 0.35                                                     | 1 : 70 : 4                                                                     | 70                               | 21000                                    | 100       | 100      | 200        | 113.6                                                                                                   | 3                  | 14        |
| 16    | Ni <sub>6</sub> In/SiO <sub>2</sub>                                     | 8                    | 500         | 3                                                        | 1 : 10 : 0                                                                     | 300                              | 36000                                    | 100       | 64       | 200        | 75.0                                                                                                    | 35                 | 15        |
| 17    | Al <sub>13</sub> Fe <sub>4</sub>                                        | 38.9                 | 20          | 0.15                                                     | 1 : 10 : 100                                                                   | 30                               | 90000                                    | 85        | 84       | 200        | 16.4                                                                                                    | 14                 | 16        |
| 18    | Ni-SAs/N-C                                                              | 5.67                 | 400         | 0.2                                                      | 1 : 20 : 100                                                                   | 40                               | 6000                                     | 96        | 91       | 200        | 8.5                                                                                                     | 18                 | 17        |
| 19    | Co <sub>2</sub> FeGe                                                    | 47.8                 | 400         | 0.03                                                     | 1 : 400 : 100                                                                  | 30                               | 4500                                     | 91        | 90       | 200        | 0.1                                                                                                     |                    | 18        |
| 20    | Ni <sub>3</sub> Ga/TiO <sub>2</sub>                                     | 1                    | 80          | 1                                                        | 2 : 10 : 0                                                                     | 50                               | 37500                                    | 100       | 97       | 230        | 1250.0                                                                                                  | 1                  | This work |
| 21    | NiCuFeGaGe/SiO <sub>2</sub>                                             | 1                    | 100         | 1                                                        | 1 : 10 : 0                                                                     | 50                               | 30000                                    | 100       | 98       | 220        | 1000.0                                                                                                  | 28                 | 19        |
| 22    | NiCu/ZrO <sub>2</sub>                                                   | 4.6                  | 25          | 0.4                                                      | 1:10:20                                                                        | 40                               | 96000                                    | 100       | 93       | 220        | 347.8                                                                                                   | 15                 | 20        |
| 23    | Ni <sub>3</sub> Ga/MgAl <sub>2</sub> O <sub>4</sub>                     | 2                    | 100         | 0.33                                                     | 1 : 20 : 100                                                                   | 67                               | 144000                                   | 92        | 77       | 220        | 153.3                                                                                                   | 24                 | 21        |
| 24    | Ni/MCM-41                                                               | 25                   | 100         | 3.7                                                      | 1 : 2 : 0                                                                      | 66.6                             | 40000                                    | 96        | 87       | 240        | 142.2                                                                                                   | 10                 | 22        |
| 25    | Ni <sub>3</sub> Ge/MCM-41                                               | 3.2                  | 1500        | 3.9                                                      | 1 : 2.1 : 0                                                                    | 29                               | 1160                                     | 94        | 89       | 250        | 76.4                                                                                                    |                    | 23        |
| 26    | Cu <sub>2.75</sub> Ni <sub>0.25</sub> Fe                                | -                    | 150         | 0.63                                                     | 1.5:4.5:8.1                                                                    | 42                               | 16800                                    | 100       | 75       | 250        |                                                                                                         | 30                 | 24        |
| 27    | Cu/Fe <sub>0.16</sub> MgO <sub>x</sub>                                  | 18.0                 | 200         | 0.69                                                     | 1 : 100 : 3                                                                    | 209                              | 62700                                    | 100       | 95       | 215        | 19.2                                                                                                    | 40                 | 25        |
| 28    | NiSb/MgAl LDH                                                           | 8.58                 | 300         | 0.15                                                     | 0.5:2.5:30                                                                     | 30                               | 6000                                     | 100       | 93.2     | 260        | 5.8                                                                                                     | 48                 | 26        |
| 29    | NiCu <sub>0.125</sub> /MCM-41                                           | 1                    | 100         | 3.3                                                      | 1 : 3 : 0                                                                      | 13.3                             | 8000                                     | 100       | 63       | 250        | 3333.3                                                                                                  | 9                  | 27        |

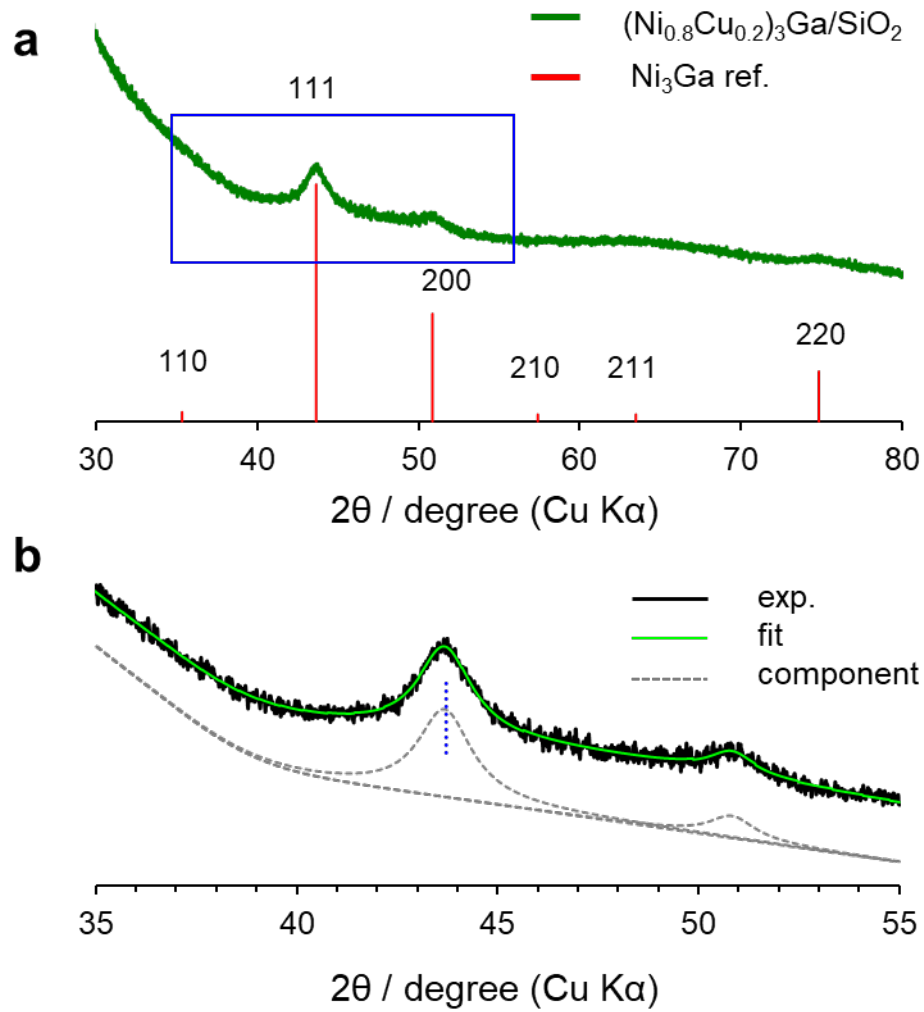

Figure S13. (a) XRD pattern of  $(\text{Ni}_{0.8}\text{Cu}_{0.2})_3\text{Ga}/\text{SiO}_2$  and (b) its magnification indicated as the blue square. The center of 111 diffraction was at  $43.72^\circ$  (blue dotted line), which agreed with that of  $(\text{Ni}_{0.8}\text{Cu}_{0.2})_3\text{Ga}/\text{TiO}_2$  ( $43.74^\circ$ ).

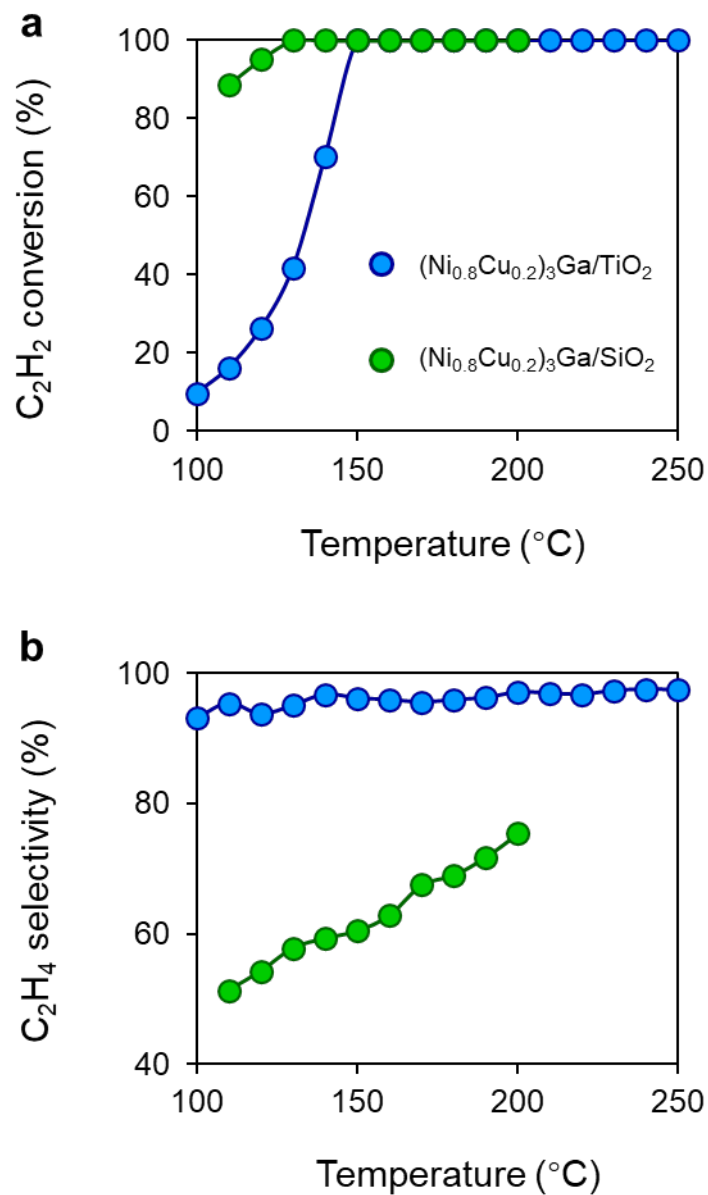

Figure S14. (a)  $\text{C}_2\text{H}_2$  conversion and (b)  $\text{C}_2\text{H}_4$  selectivity as a function of reaction temperature in the absence of ethylene ( $\text{C}_2\text{H}_2:\text{H}_2:\text{He} = 1:10:39 \text{ mLmin}^{-1}$ ) over  $(\text{Ni}_{0.8}\text{Cu}_{0.2})_3\text{Ga}/\text{TiO}_2$  and  $(\text{Ni}_{0.8}\text{Cu}_{0.2})_3\text{Ga}/\text{SiO}_2$ .



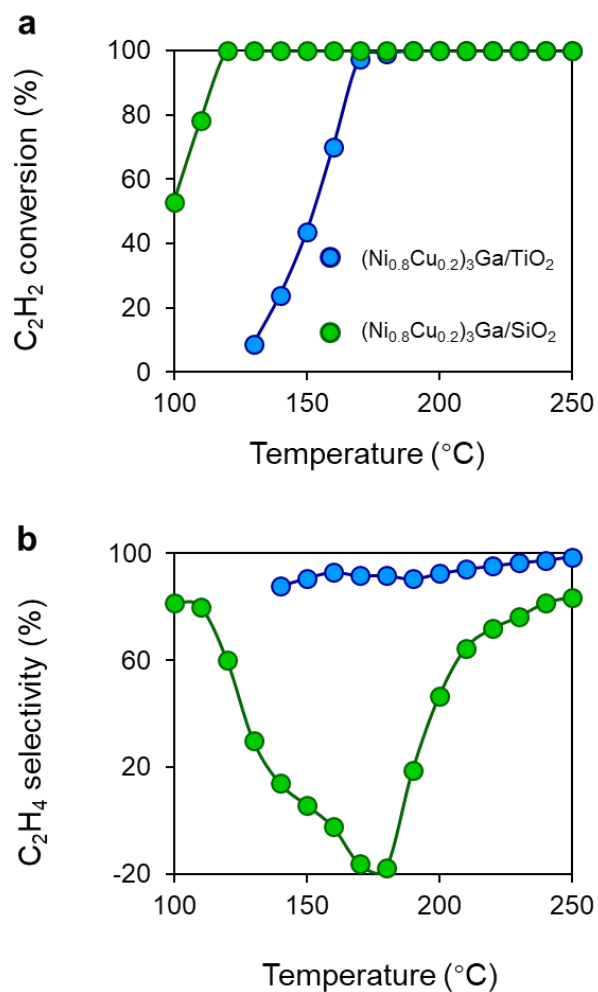

Figure S15. (a)  $\text{C}_2\text{H}_2$  conversion and (b)  $\text{C}_2\text{H}_4$  selectivity as a function of reaction temperature in the presence of ethylene ( $\text{C}_2\text{H}_2:\text{H}_2:\text{He}:\text{C}_2\text{H}_4 = 1:10:39:5 \text{ mLmin}^{-1}$ ) over  $(\text{Ni}_{0.8}\text{Cu}_{0.2})_3\text{Ga}/\text{TiO}_2$  and  $(\text{Ni}_{0.8}\text{Cu}_{0.2})_3\text{Ga}/\text{SiO}_2$ . A reverse volcano-type trend was clearly observed in the selectivity change for the  $\text{SiO}_2$ -supported catalyst, which can be rationalized by two opposite factors. When temperature increases, the selectivity begins to decrease because the hydrogenation ability is enhanced, whereas it turns to increase because ethylene desorption is also accelerated. A similar trend can also be seen in Figure 3c,  $(\text{Ni}_{0.67}\text{Cu}_{0.33})_3\text{Ga}/\text{TiO}_2$ .

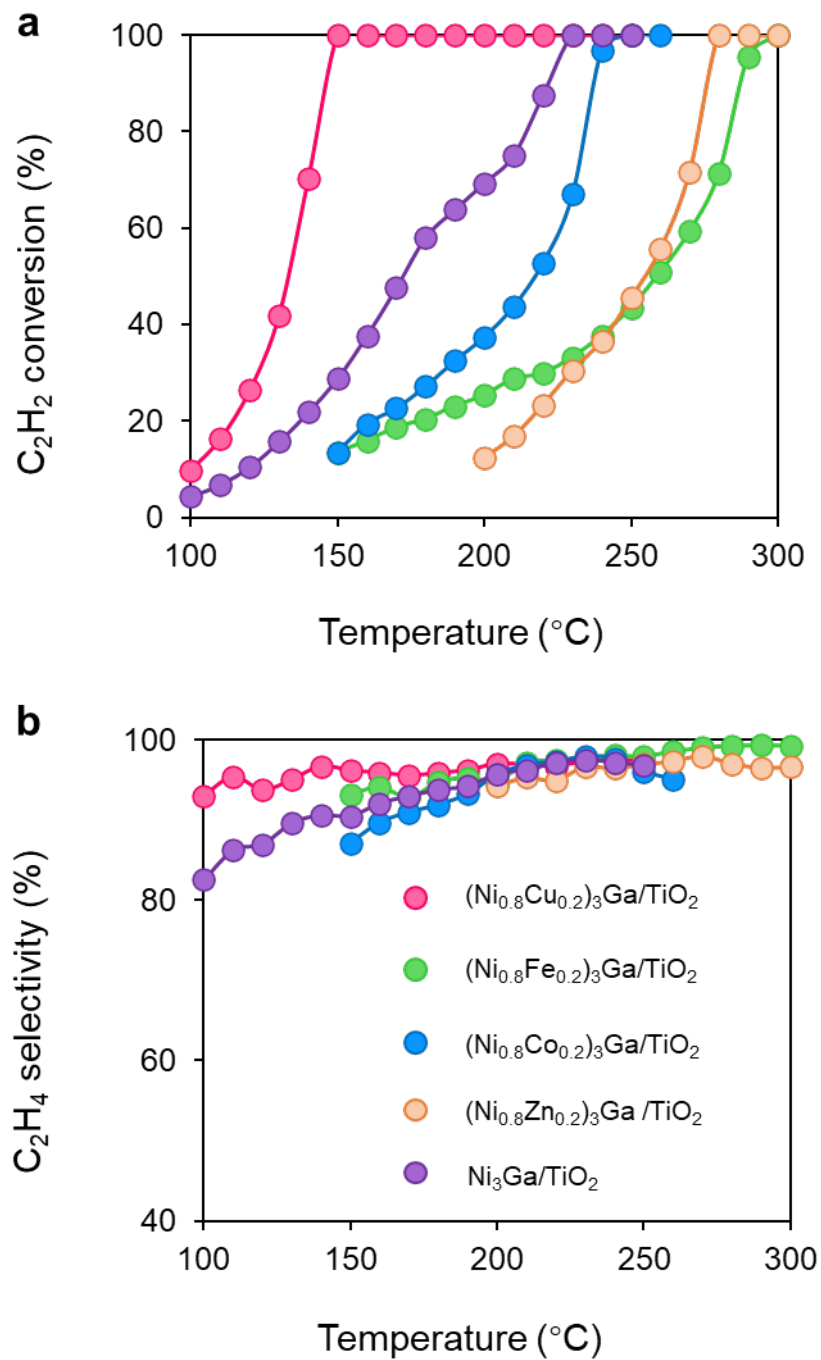

Figure S16. (a) C<sub>2</sub>H<sub>2</sub> conversion and (b) C<sub>2</sub>H<sub>4</sub> selectivity as a function of reaction temperature over (Ni<sub>0.8</sub>M<sub>0.2</sub>)<sub>3</sub>Ga/TiO<sub>2</sub> (M = Cu, Fe, Co, Zn) and Ni<sub>3</sub>Ga/TiO<sub>2</sub>.

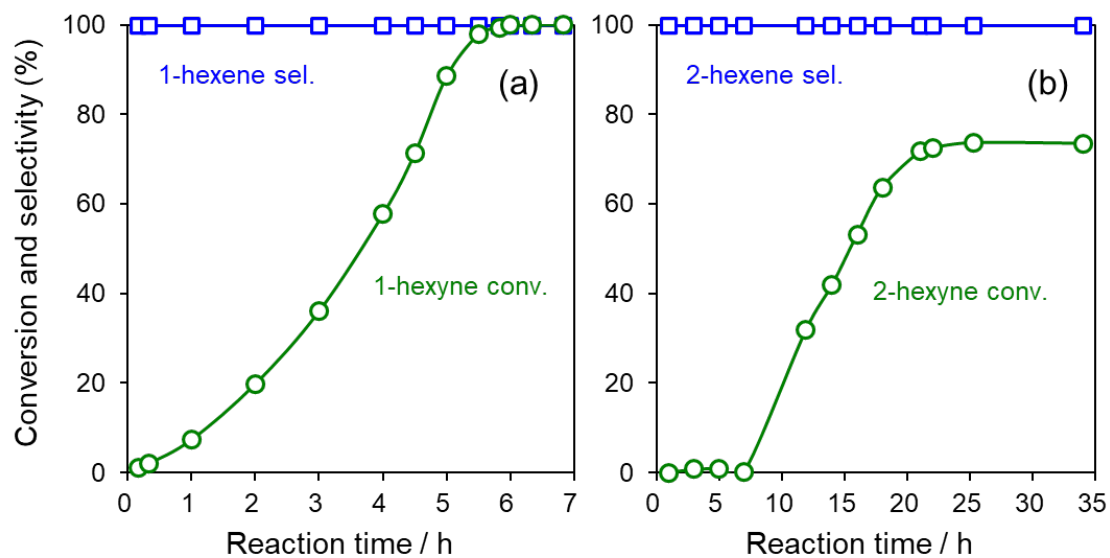

Figure S17. Catalytic performance of  $(\text{Ni}_{0.8}\text{Cu}_{0.2})_3\text{Ga}/\text{TiO}_2$  in liquid phase hydrogenation of (a) 1-hexyne and (b) 2-hexyne. For 2-hexyne hydrogenation, the reaction occurred after an induction period and did not reach 100% conversion for some reason.

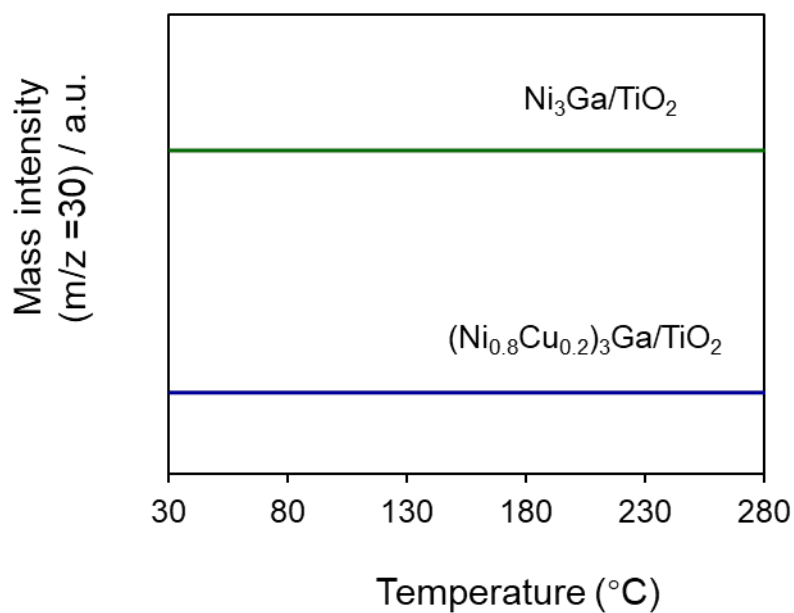

Figure S18. Ethylene temperature programmed surface reaction profiles (TPSR) of the  $(\text{Ni}_{0.8}\text{Cu}_{0.2})_3\text{Ga}/\text{TiO}_2$  and  $\text{Ni}_3\text{Ga}/\text{TiO}_2$  catalysts for ethylene hydrogenation.

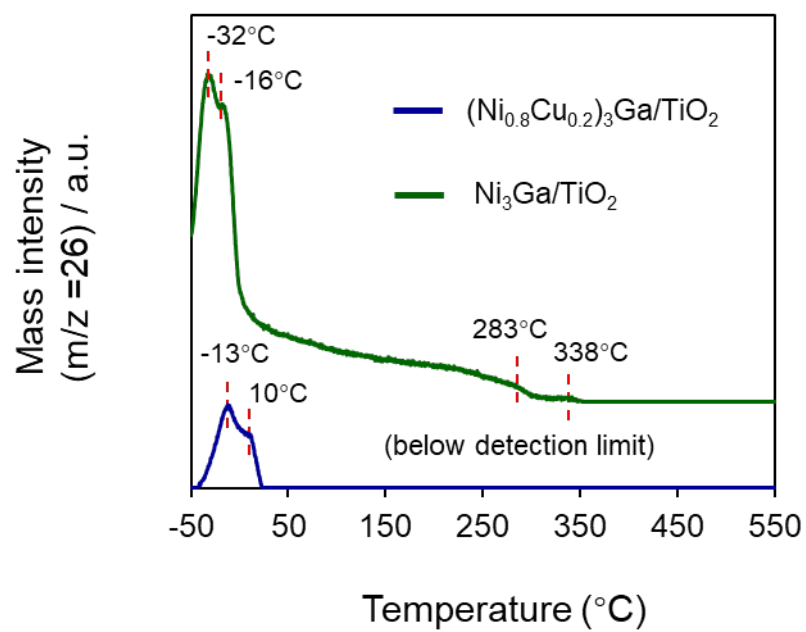

Figure S19.  $\text{C}_2\text{H}_2$ -TPD profiles of the  $(\text{Ni}_{0.8}\text{Cu}_{0.2})_3\text{Ga}/\text{TiO}_2$  and  $\text{Ni}_3\text{Ga}/\text{TiO}_2$  catalysts.

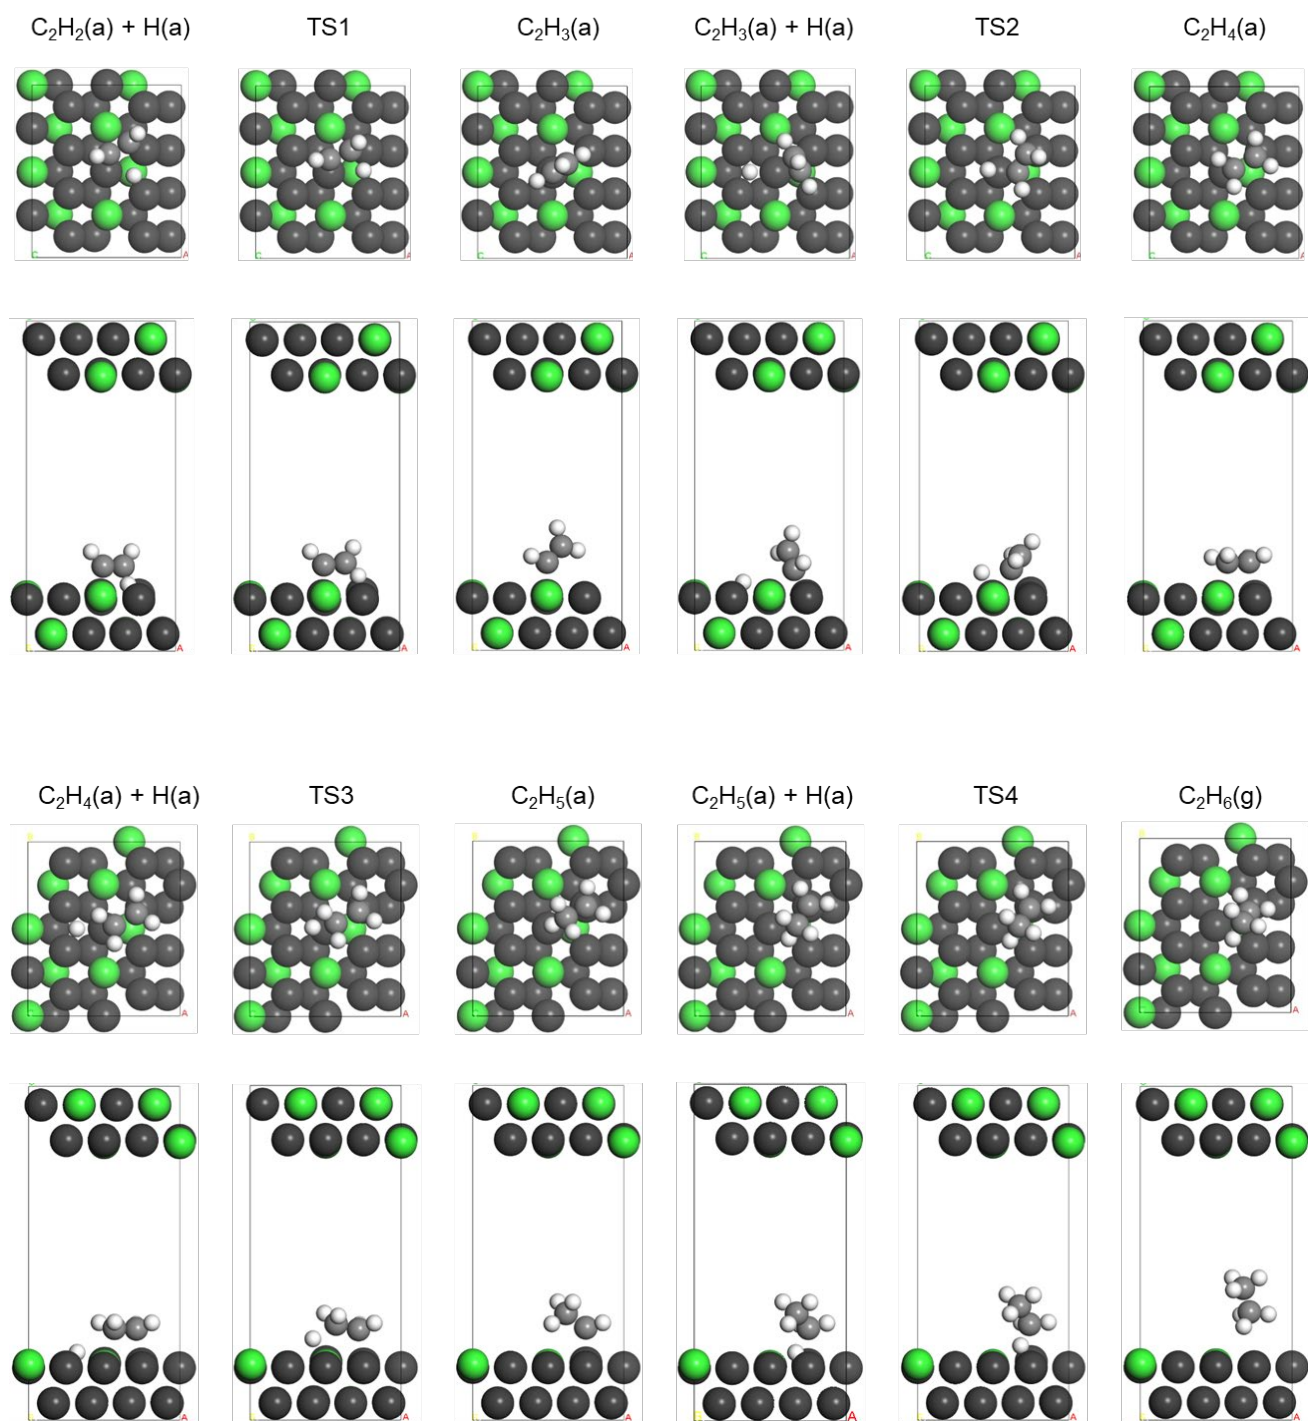

Figure S20. Optimized structures of the slab and adsorbates in acetylene hydrogenation to ethane over  $Ni_3Ga(111)$ .

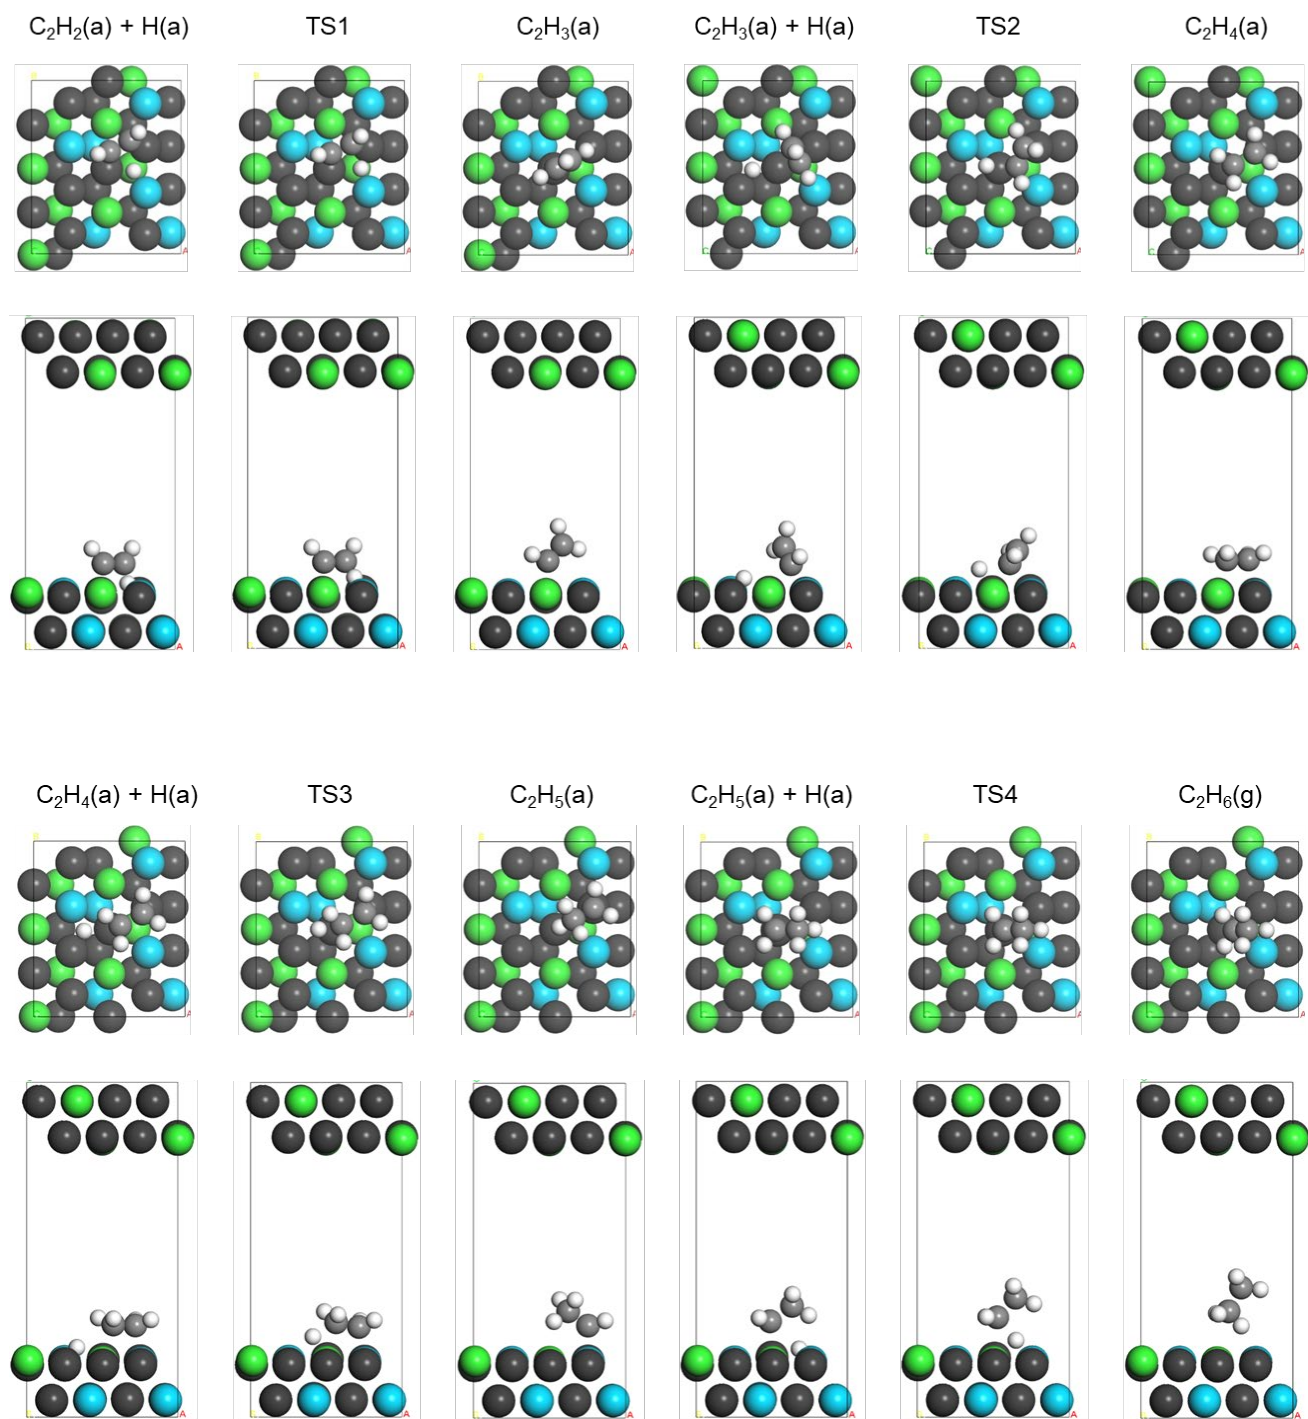

Figure S21. Optimized structures of the slab and adsorbates in acetylene hydrogenation to ethane over  $(Ni_{0.8}Cu_{0.2})_3Ga(111)$ .

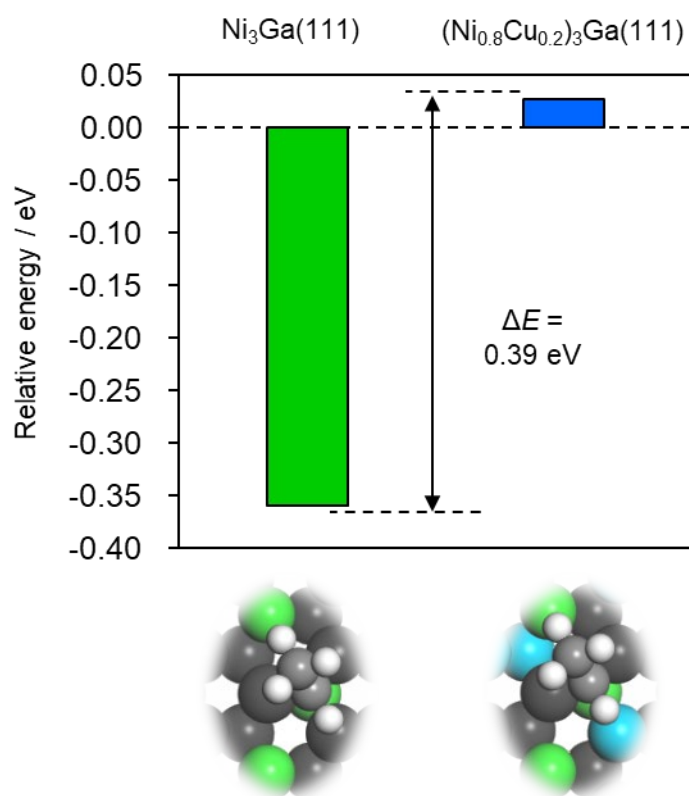

Figure S22. Relative energy of ethylidene intermediate on  $\text{Ni}_3\text{Ga}(111)$  and  $(\text{Ni}_{0.8}\text{Cu}_{0.2})_3\text{Ga}(111)$ . Sum of gas phase  $\text{C}_2\text{H}_6$  and the clean slab was set to zero in energy as in Figure 3a.

### Supplementary Note

#### Supplementary References

- 1 X. Ge, Z. Ren, Y. Cao, X. Liu, J. Zhang, G. Qian, X. Gong, L. Chen, X. Zhou, W. Yuan and X. Duan, *Journal of Materials Chemistry A*, 2022, 19722–19731.
- 2 B. Fu, A. J. McCue, Y. Liu, S. Weng, Y. Song, Y. He, J. Feng and D. Li, *ACS Catalysis*, 2022, **12**, 607–615.
- 3 Y. Liu, J. Zhao, J. Feng, Y. He, Y. Du and D. Li, *Journal of Catalysis*, 2018, **359**, 251–260.
- 4 C. Lu, A. Zeng, Y. Wang and A. Wang, *ACS Omega*, 2021, **6**, 3363–3371.



- 5 C. Lu, Y. Wang, R. Zhang, B. Wang and A. Wang, *ACS applied materials & interfaces*, 2020, **12**, 46027–46036.
- 6 Y. Wang, B. Liu, X. Lan and T. Wang, *ACS Catalysis*, 2021, **11**, 10257–10266.
- 7 H. Liu, M. Chai, G. Pei, X. Liu, L. Li, L. Kang, A. Wang and T. Zhang, *Chinese Journal of Catalysis*, 2020, **41**, 1099–1108.
- 8 H. Zhou, B. Li, H. Fu, X. Zhao, M. Zhang, X. Wang, Y. Liu, Z. Yang and X. Lou, *ACS Sustainable Chemistry and Engineering*, 2022, **10**, 4849–4861.
- 9 Y. Cao, H. Zhang, S. Ji, Z. Sui, Z. Jiang, D. Wang, F. Zaera, X. Zhou, X. Duan and Y. Li, *Angewandte Chemie*, 2020, **132**, 11744–11749.
- 10 X. Shi, Y. Lin, L. Huang, Z. Sun, Y. Yang, X. Zhou, E. Vovk, X. Liu, X. Huang, M. Sun, S. Wei and J. Lu, *ACS Catalysis*, 2020, **10**, 3495–3504.
- 11 Y. Chai, G. Wu, X. Liu, Y. Ren, W. Dai, C. Wang, Z. Xie, N. Guan and L. Li, *Journal of the American Chemical Society*, 2019, **141**, 9920–9927.
- 12 J. Gu, M. Jian, L. Huang, Z. Sun, A. Li, Y. Pan, J. Yang, W. Wen, W. Zhou, Y. Lin, H. J. Wang, X. Liu, L. Wang, X. Shi, X. Huang, L. Cao, S. Chen, X. Zheng, H. Pan, J. Zhu, S. Wei, W. X. Li and J. Lu, *Nature Nanotechnology*, 2021, **16**, 1141–1149.
- 13 F. Huang, Y. Deng, Y. Chen, X. Cai, M. Peng, Z. Jia, J. Xie, D. Xiao, X. Wen, N. Wang, Z. Jiang, H. Liu and D. Ma, *Nature Communications*, 2019, **10**, 4431.
- 14 C. Riley, A. De La Riva, S. Zhou, Q. Wan, E. Peterson, K. Artyushkova, M. D. Farahani, H. B. Friedrich, L. Burkemper, N. V. Atudorei, S. Lin, H. Guo and A. Datye, *ChemCatChem*, 2019, **11**, 1526–1533.
- 15 Y. Chen and J. Chen, *Applied Surface Science*, 2016, **387**, 16–27.
- 16 M. Armbrüster, K. Kovnir, M. Friedrich, D. Teschner, G. Wowsnick, M. Hahne, P. Gille, L. Szentmiklósi, M. Feuerbacher, M. Heggen, F. Girgsdies, D. Rosenthal, R. Schlögl and Y. Grin, *Nature Materials*, 2012, **11**, 690–693.
- 17 X. Dai, Z. Chen, T. Yao, L. Zheng, Y. Lin, W. Liu, H. Ju, J. Zhu, X. Hong, S. Wei, Y. Wu and Y. Li, *Chemical Communications*, 2017, **53**, 11568–11571.
- 18 T. Kojima, S. Kameoka, S. Fujii, S. Ueda and A. P. Tsai, *Science Advances*, 2018, **4**, 1–8.
- 19 J. Ma, F. Xing, Y. Nakaya, K. ichi Shimizu and S. Furukawa, *Angewandte Chemie - International Edition*, 2022, **61**, 1–7.
- 20 Z. Li, J. Zhang, J. Tian, K. Feng, Z. Jiang and B. Yan, *Chemical Engineering Journal*, 2022, **450**, 138244.
- 21 Y. Liu, X. Liu, Q. Feng, D. He, L. Zhang, C. Lian, R. Shen, G. Zhao, Y. Ji, D. Wang, G. Zhou and Y. Li, *Advanced Materials*, 2016, **28**, 4747–4754.
- 22 J. Zhao, L. He, J. Yu, Y. Shi, R. Miao, Q. Guan and P. Ning, *New Journal of Chemistry*, 2021, **45**, 1054–1062.
- 23 T. Komatsu, T. Kishi and T. Gorai, *Journal of Catalysis*, 2008, **259**, 174–182.
- 24 B. Bridier and J. Pérez-Ramírez, *Journal of the American Chemical Society*, 2010, **132**, 4321–



4327.

- 25 F. Fu, Y. Liu, Y. Li, B. Fu, L. Zheng, J. Feng and D. Li, *ACS Catalysis*, 2021, **11**, 11117–11128.
- 26 X. Ge, M. Dou, Y. Cao, X. Liu, Q. Yuwen, J. Zhang, G. Qian, X. Gong, X. Zhou, L. Chen, W. Yuan and X. Duan, *Nature communications*, 2022, **13**, 5534.
- 27 S. Zhou, L. Kang, X. Zhou, Z. Xu and M. Zhu, *Nanomaterials*, 2020, **10**, 509.
